# Supplementary material for: A dynamic transcriptomic atlas of cytokine-induced killer cells
Source: PubMed Central journal article supplement (PMC6314136; doi:10.1074/jbc.ra118.003280), 2018-10-17

**A**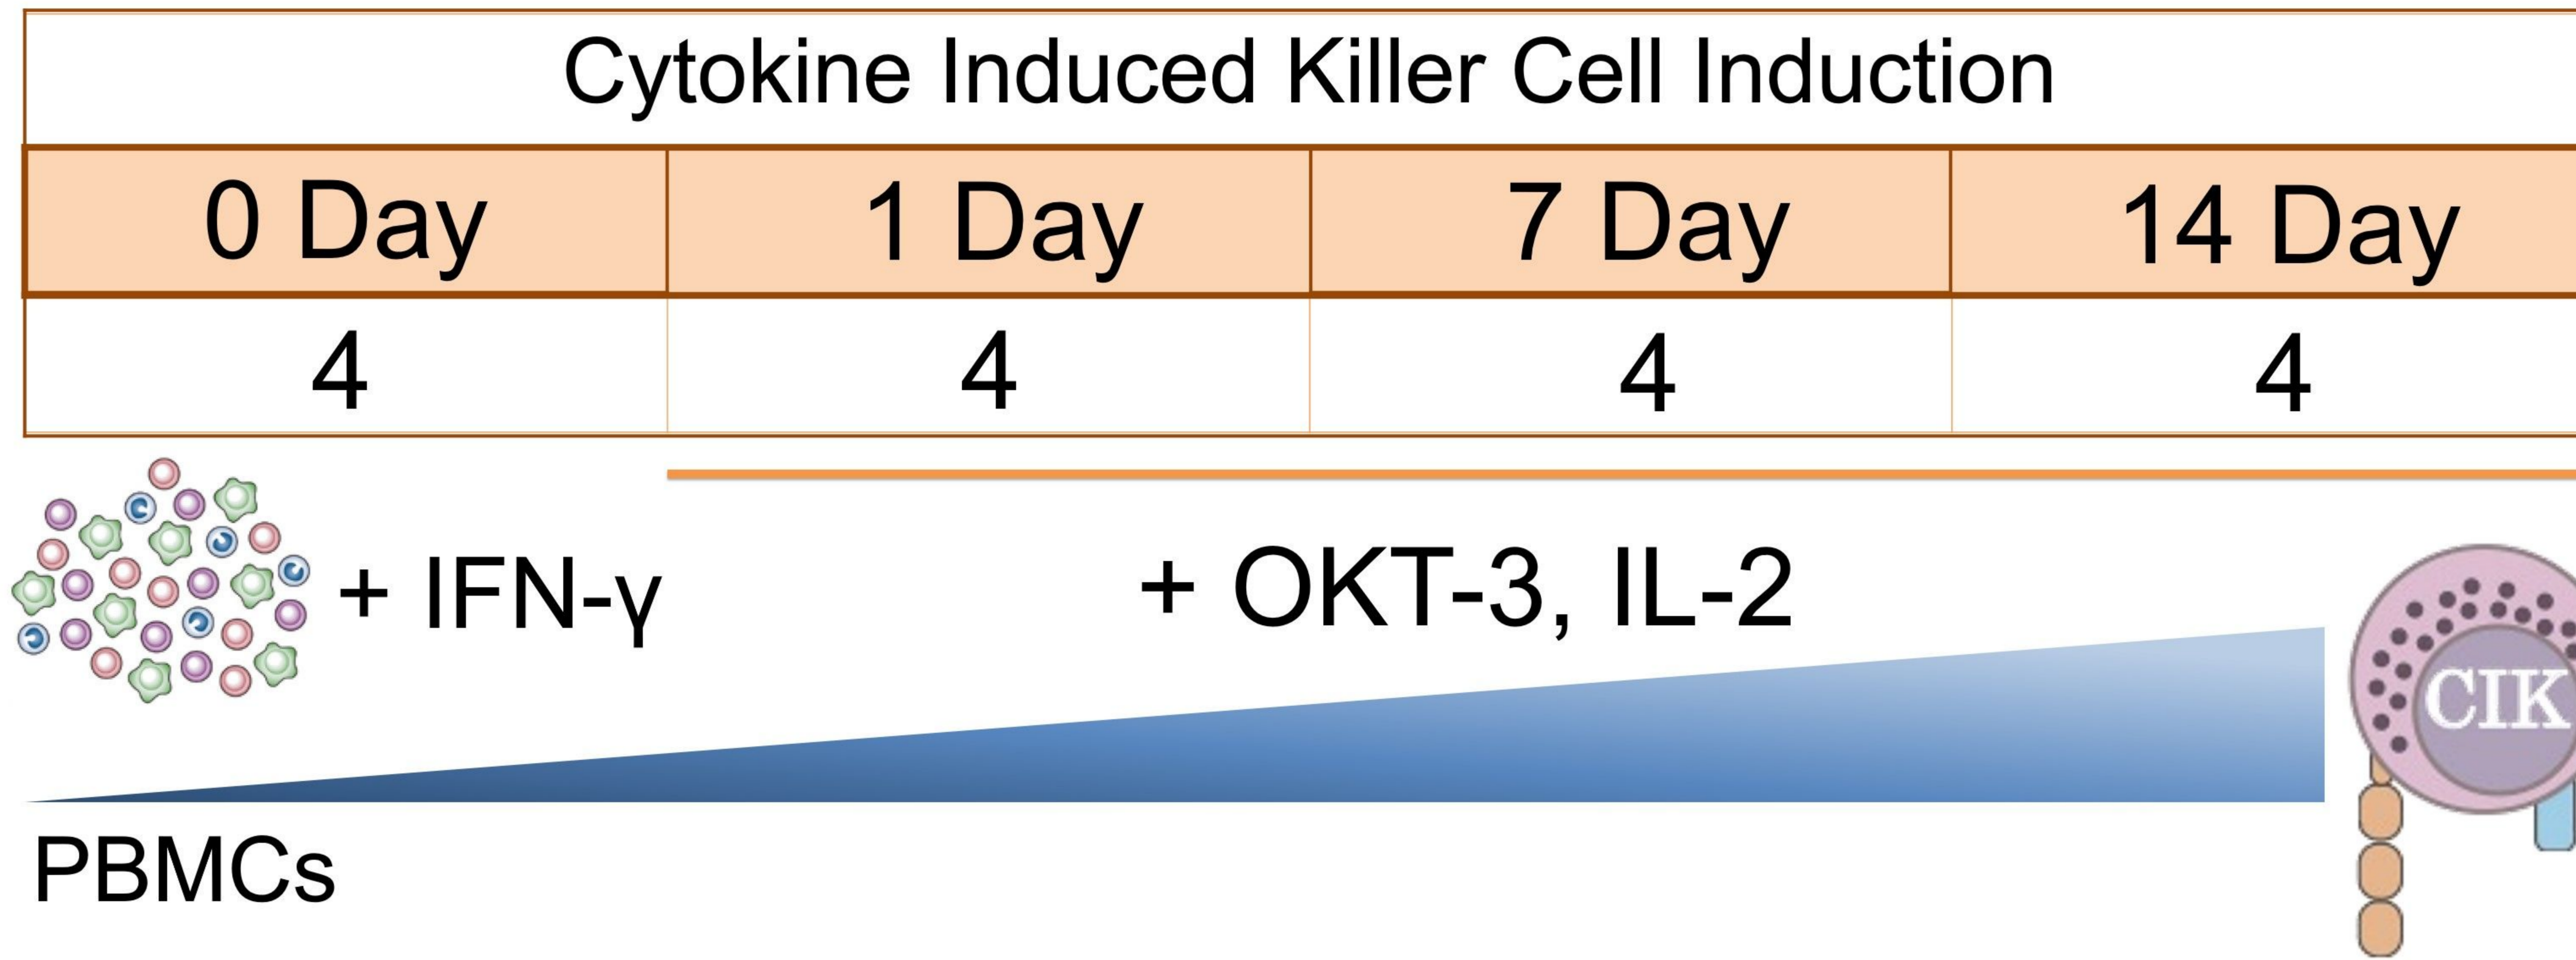**B**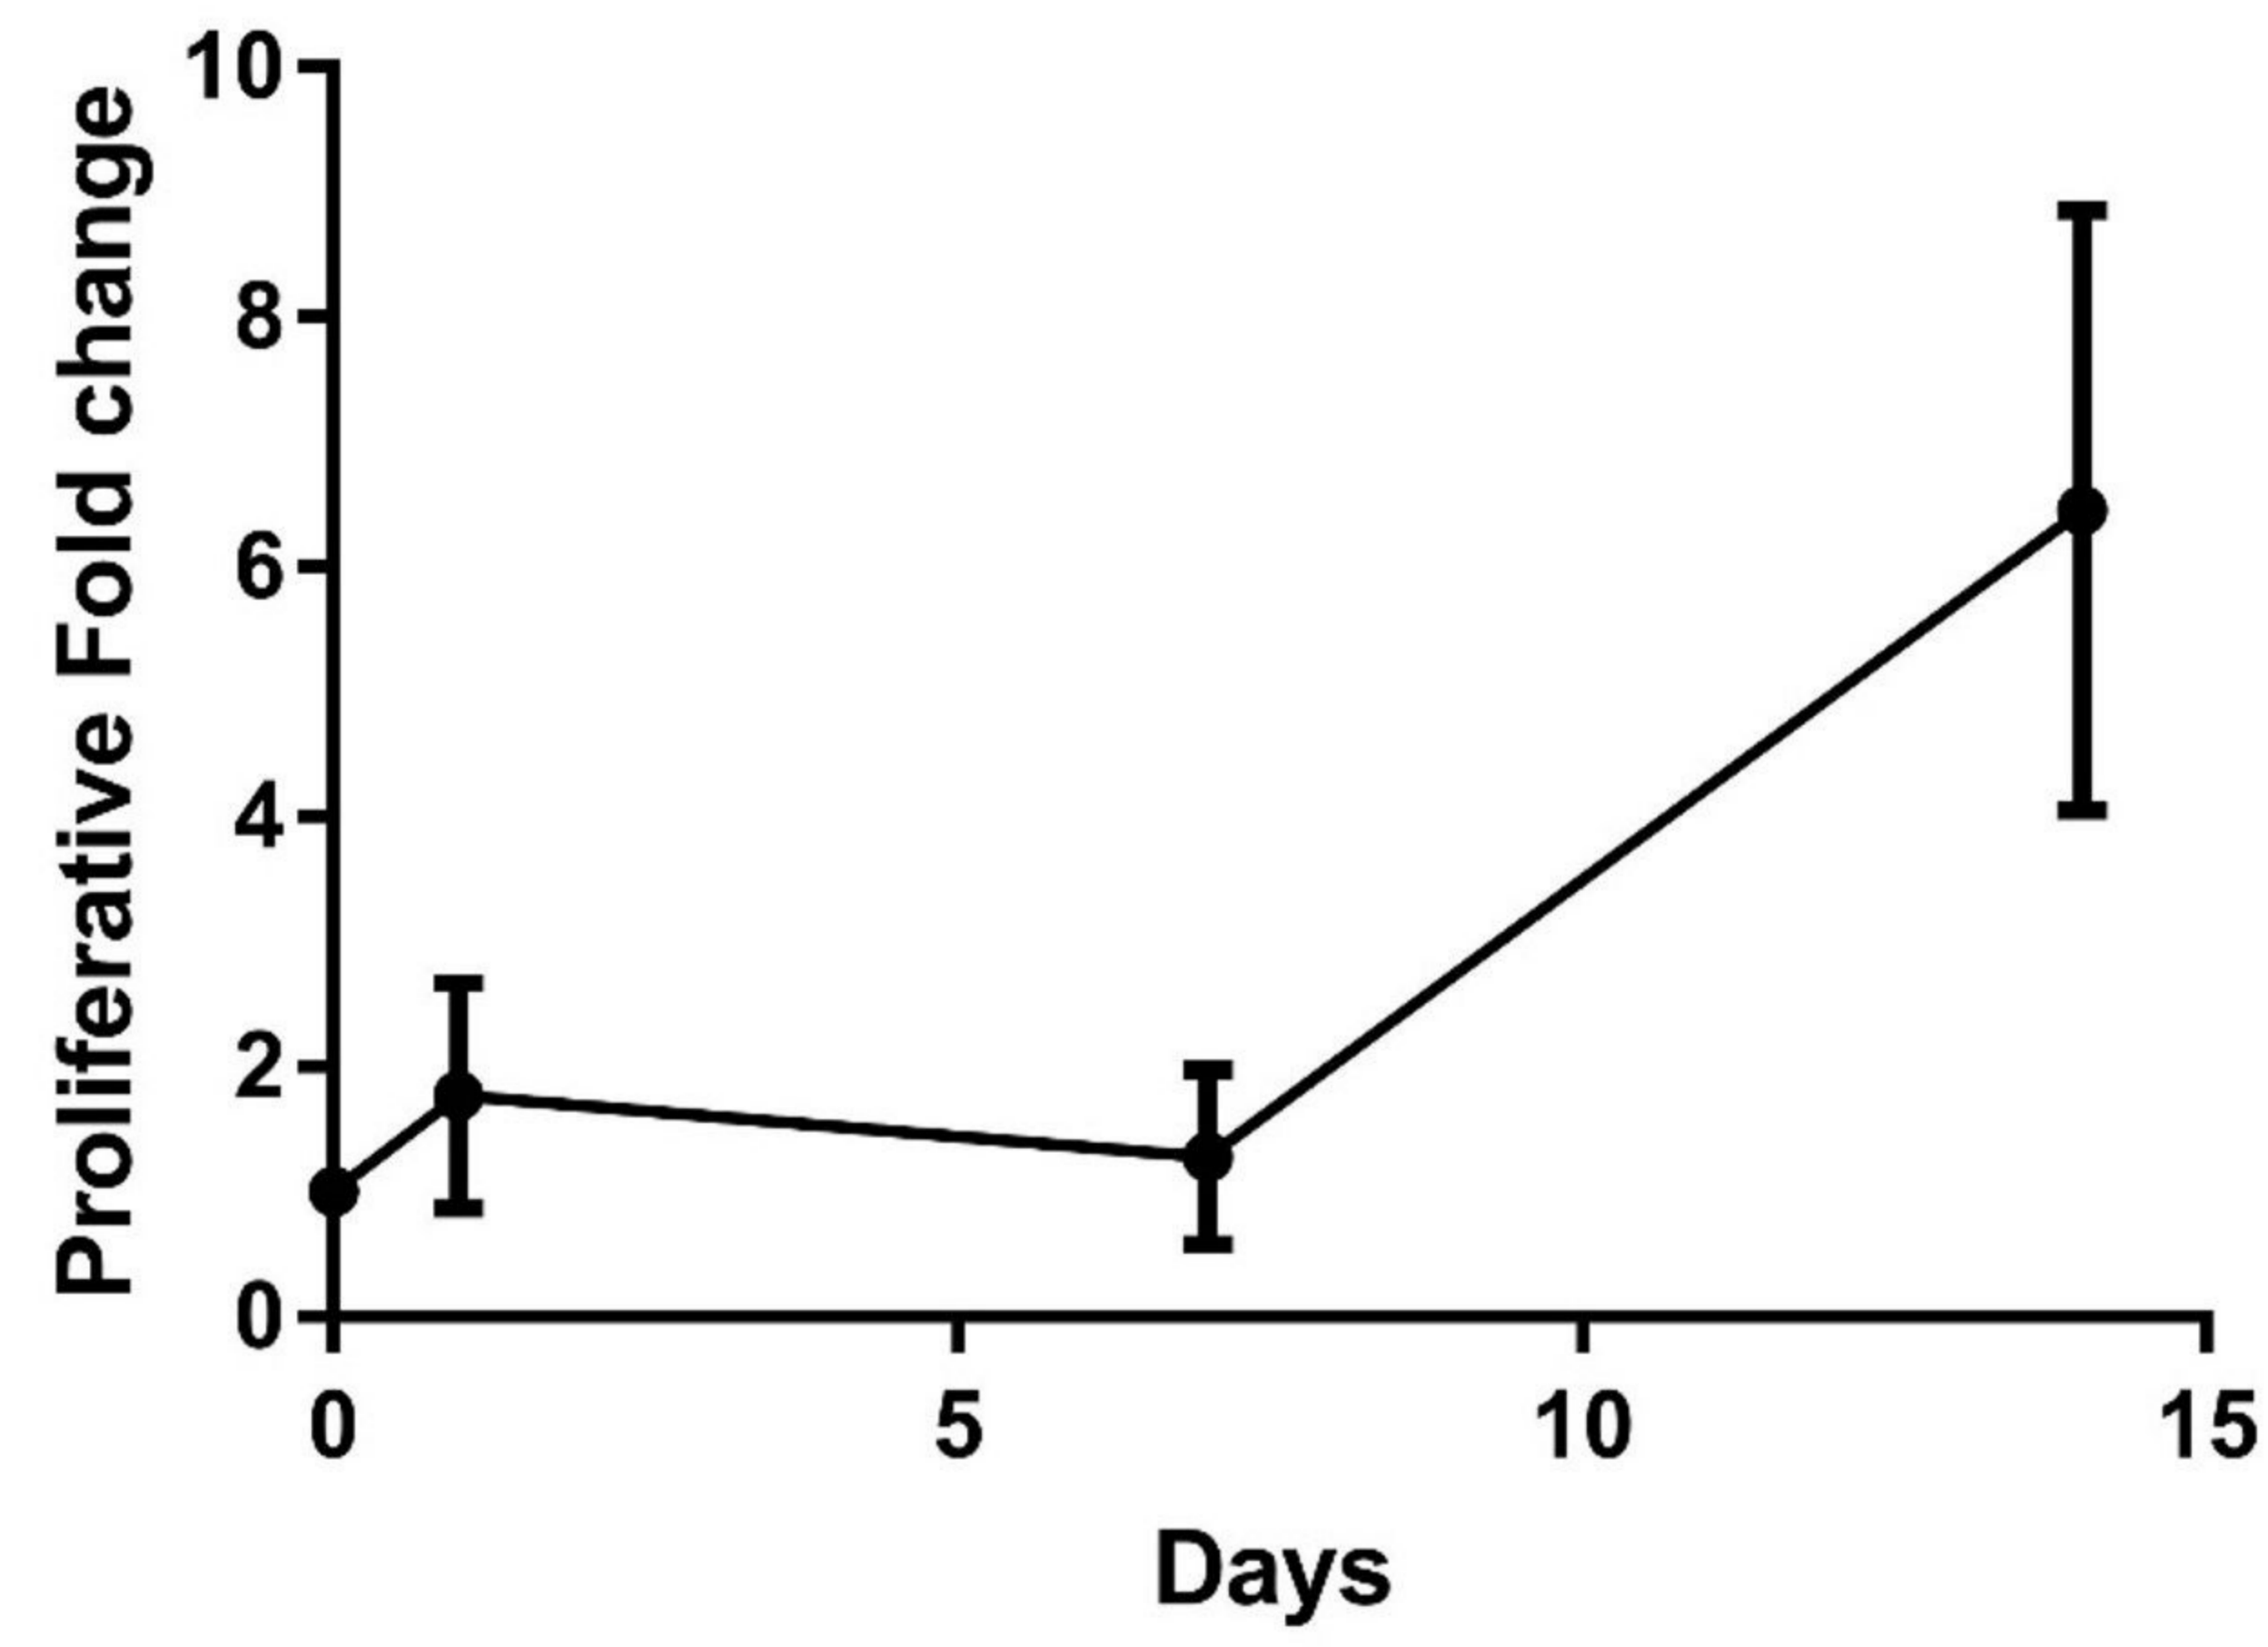**C**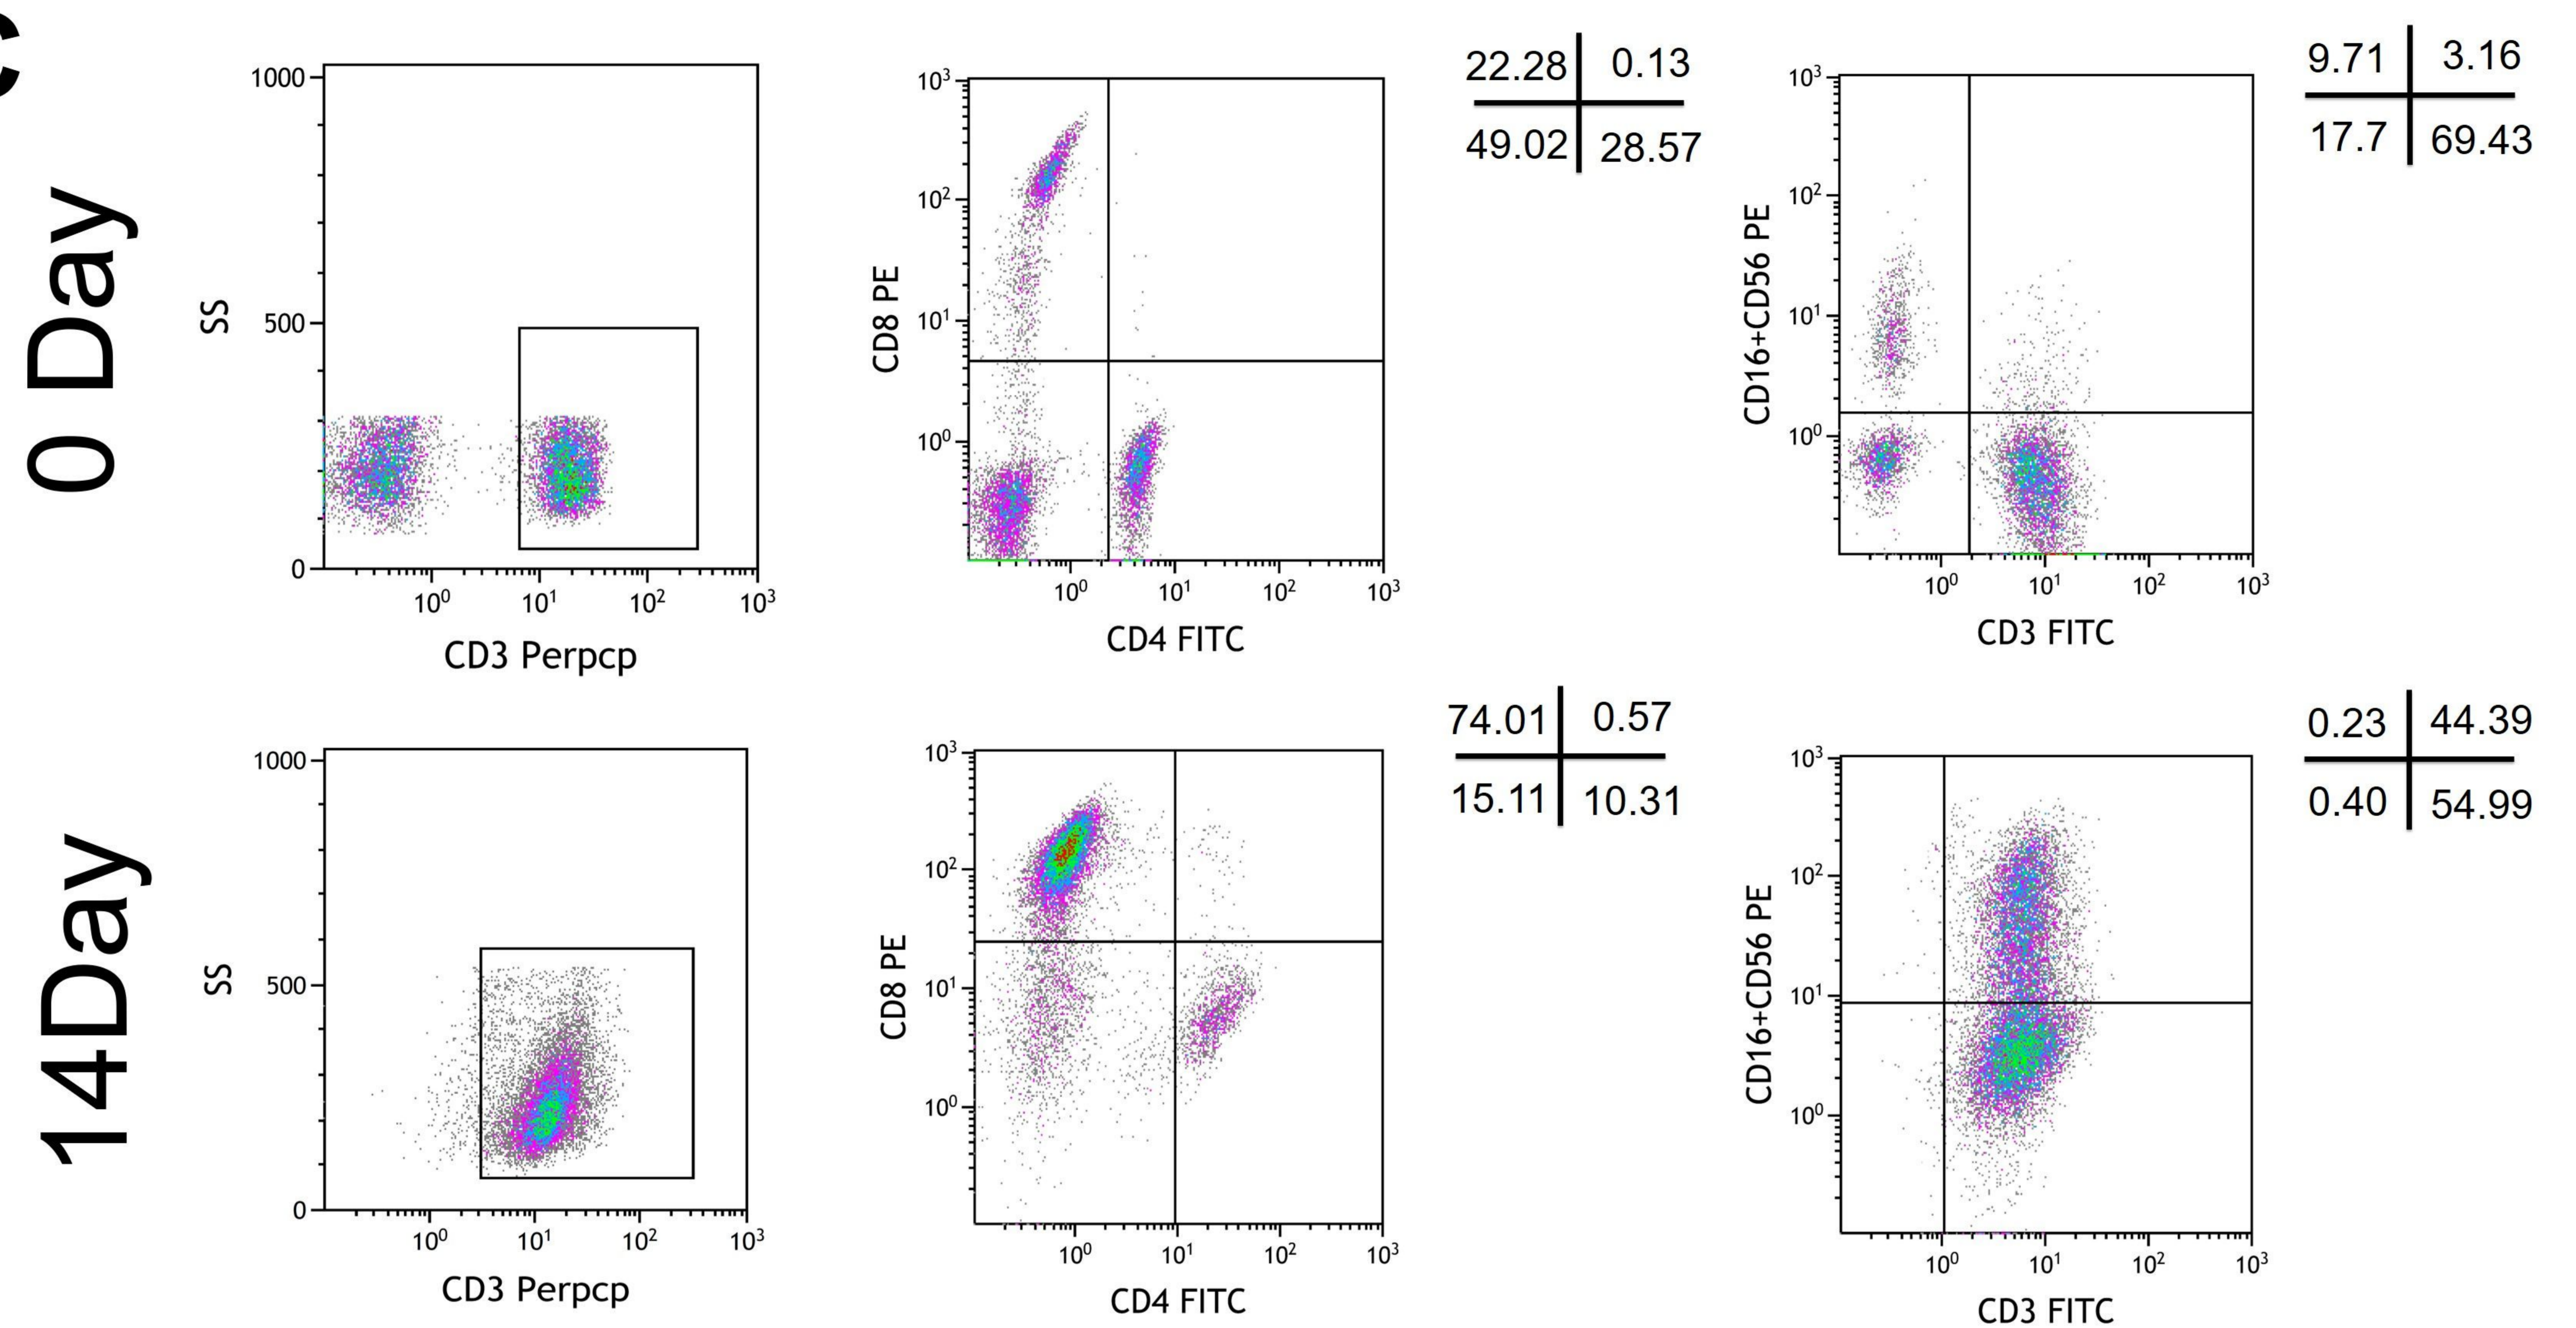

Supplement: supp_RA118.003280_Supplemental_Figure1.pdf [file supp_RA118.003280_Supplemental_Figure1.pdf]
