# Supplementary material for: A dynamic transcriptomic atlas of cytokine-induced killer cells
Source: PubMed Central journal article supplement (PMC6314136; doi:10.1074/jbc.ra118.003280), 2018-10-17

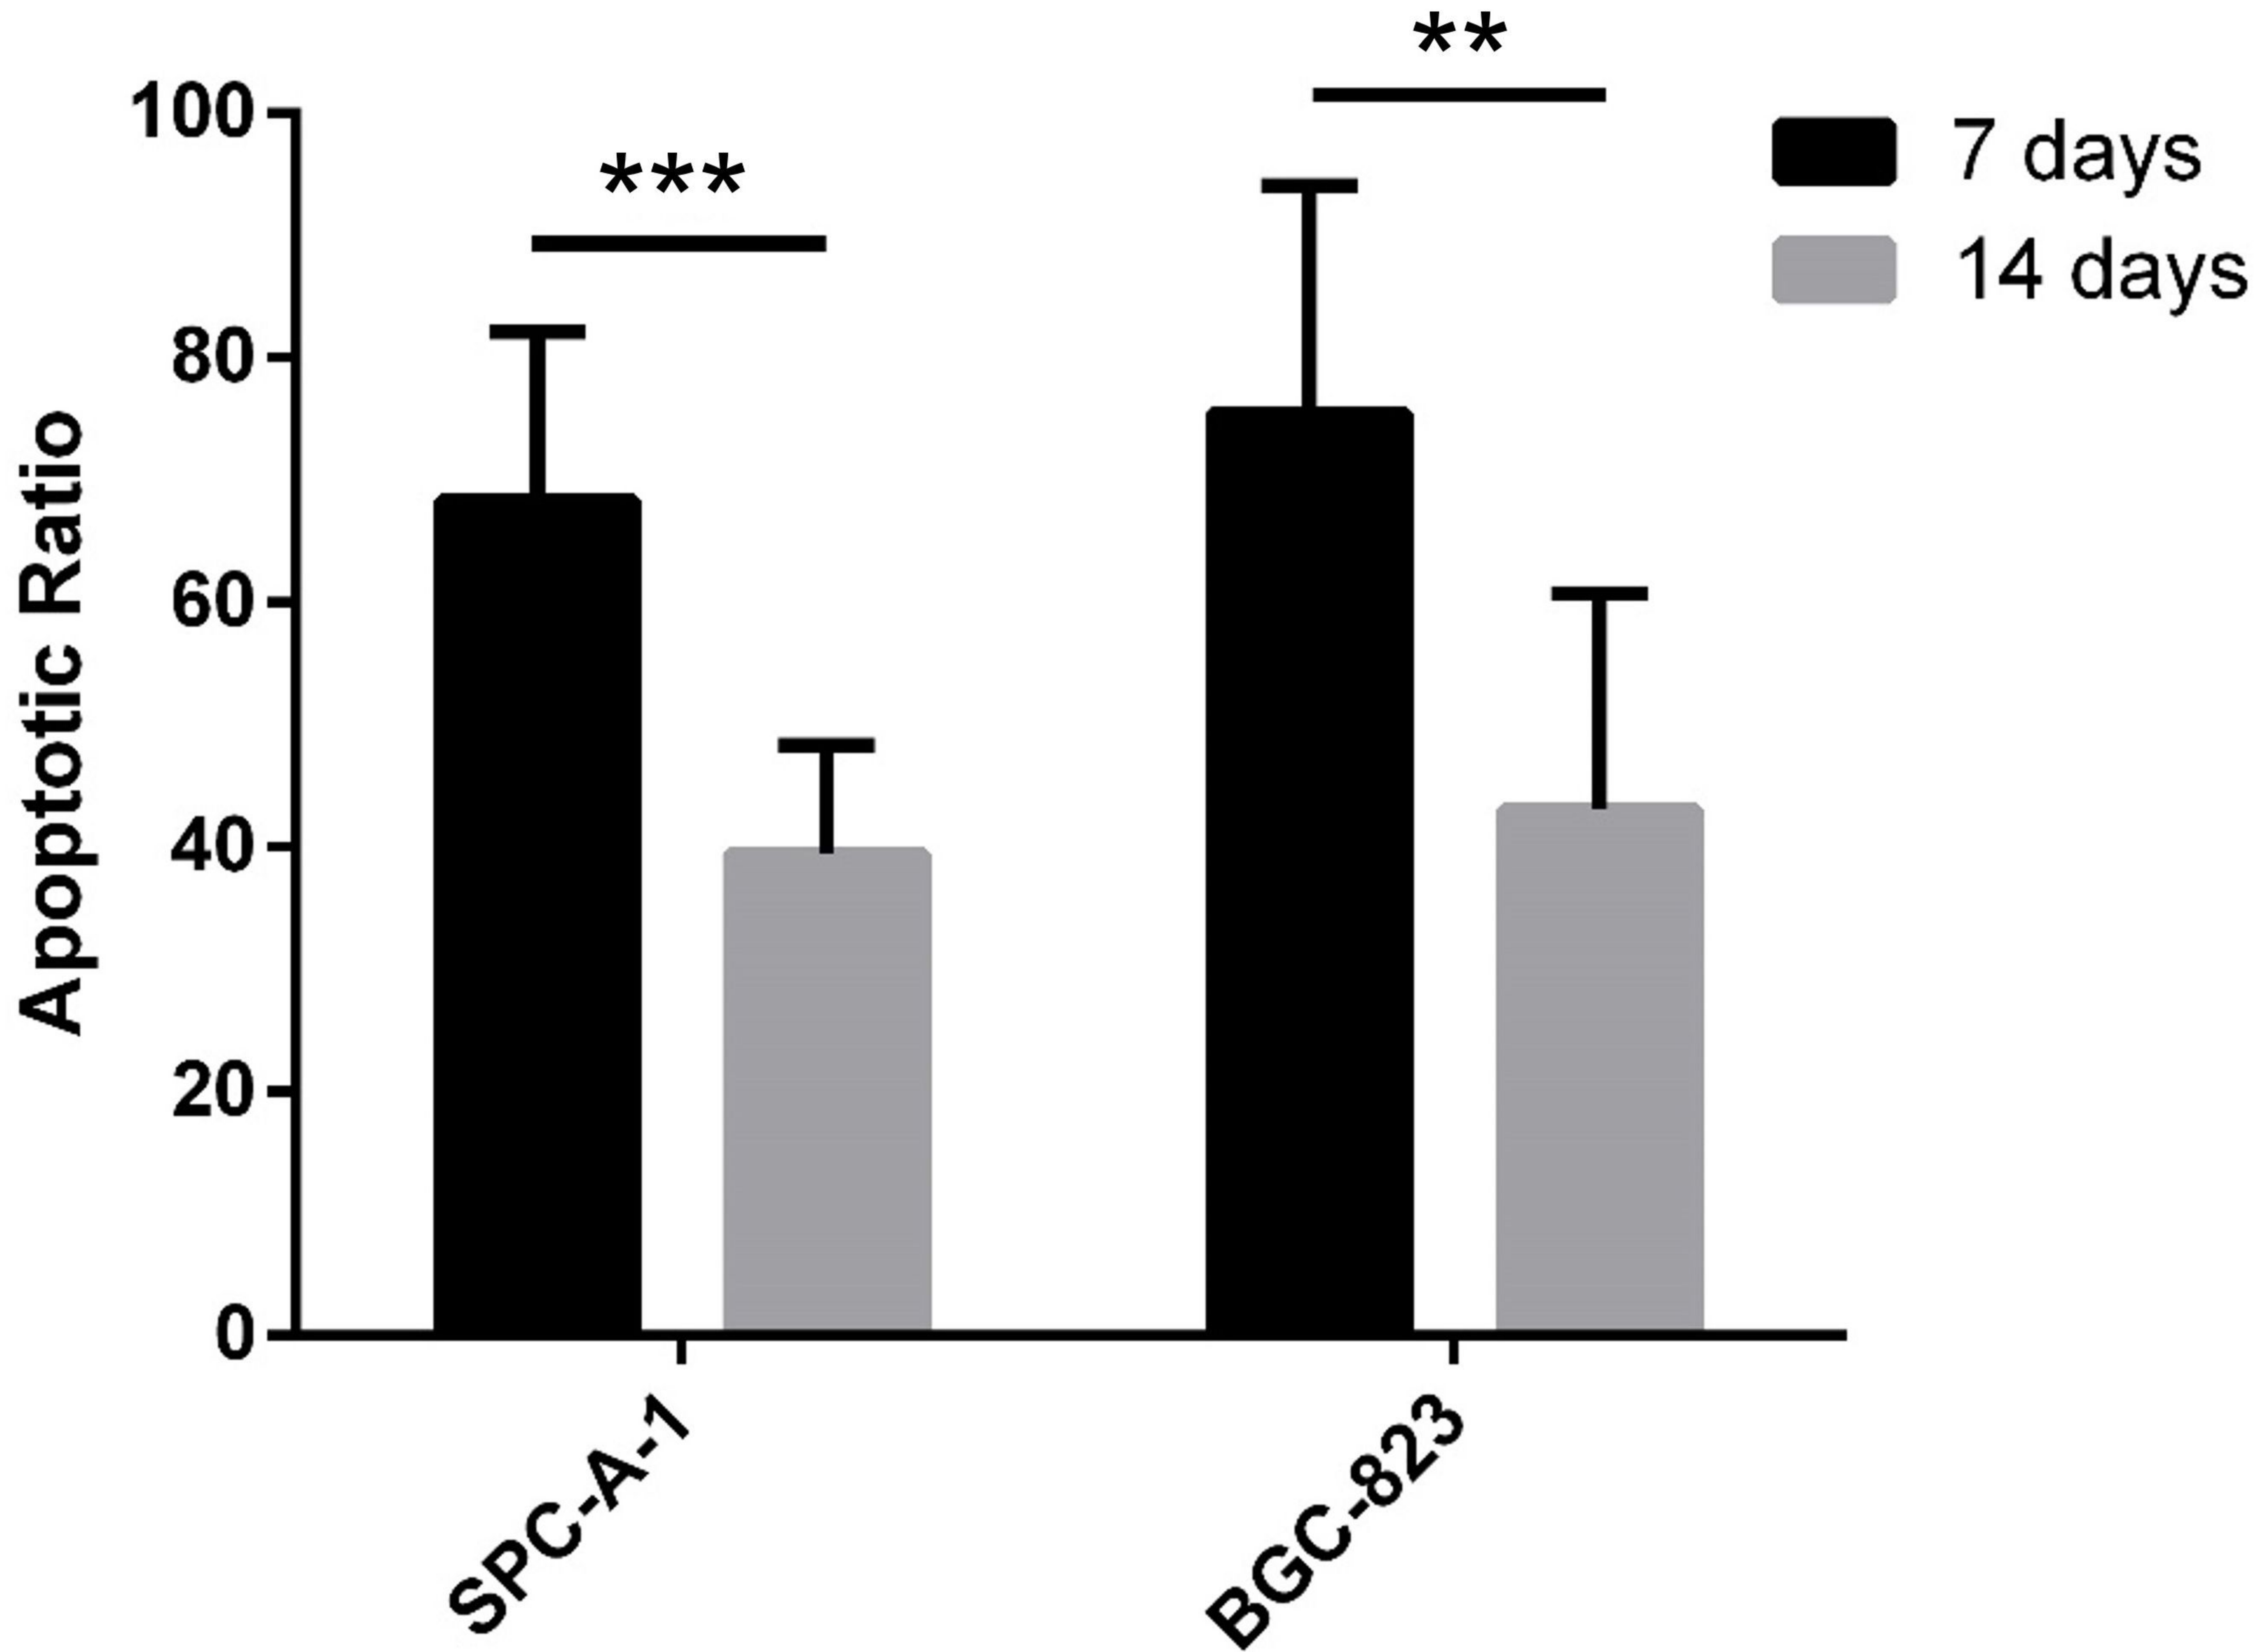

Supplement: supp_RA118.003280_Supplemental_Figure3.pdf [file supp_RA118.003280_Supplemental_Figure3.pdf]
